# Supplementary material
Source: PubMed Central journal article supplement (PMC2710043)
Supplement: mmc1.pdf [file mmc1.pdf]

Biophysical Journal, Volume 96

**Supplementary Material**

**A  $\text{Ca}_v1.1$   $\text{Ca}^{2+}$  Channel Splice Variant with High Conductance and Voltage-Sensitivity Alters EC-Coupling in Developing Skeletal Muscle**

Petronel Tuluc, Natalia Molenda, Bettina Schlick, Gerald J. Obermair, Bernhard E. Flucher, and Karin Jurkat-Rott

**Supplementary results:**

**Table 1:** Putatively non-functional splicing variants in the *CACNA1S* gene

| <i>variant</i>                | <i>protein length</i> | <i>nonsense residues</i> | <i>location in channel</i> | <i>% transcripts in adult muscle</i> |
|-------------------------------|-----------------------|--------------------------|----------------------------|--------------------------------------|
| <i>deletion of exons 3-5</i>  | 187                   | 101                      | IS1-S2                     | 3,0                                  |
| <i>deletion of exons 3-7</i>  | 111                   | 25                       | IS1-S2                     | 1,7                                  |
| <i>deletion of exons 4-5</i>  | 140                   | 8                        | IS3                        | 1,0                                  |
| <i>insertion of intron 4</i>  | 208                   | 28                       | IS4-S5                     | 2,4                                  |
| <i>insertion of intron 8</i>  | 461                   | 78                       | I-II                       | 3,0                                  |
| <i>insertion of intron 25</i> | 1115                  | 30                       | III-IV                     | 3,6                                  |
| <i>insertion of intron 26</i> | 1147                  | 9                        | IVS1                       | 2,1                                  |
| <i>insertion of intron 28</i> | 1244                  | 41                       | IVS3-S4                    | 1,3                                  |
| <i>deletion of exon 19</i>    | 1853                  | missing 20 in frame      | IIIS1-S2, IIIS2            | 1,4                                  |

**Table 2:** Putatively functional splicing variants in the *CACNA1S* gene

| <i>variant</i>                      | <i>protein length</i> | <i>nonsense residues</i> | <i>location in channel</i> | <i>% transcripts in adult muscle</i> |
|-------------------------------------|-----------------------|--------------------------|----------------------------|--------------------------------------|
| <i>deletion of exons 39-40</i>      | 1559                  | 3                        | C-terminus                 | 1,6                                  |
| <i>alternate 5' site of exon 40</i> | 1847                  | missing 26 in frame      | C-terminus                 | 1,5                                  |
| <i>insertion of intron 43</i>       | 1851                  | 61                       | C-terminus                 | 3,0                                  |

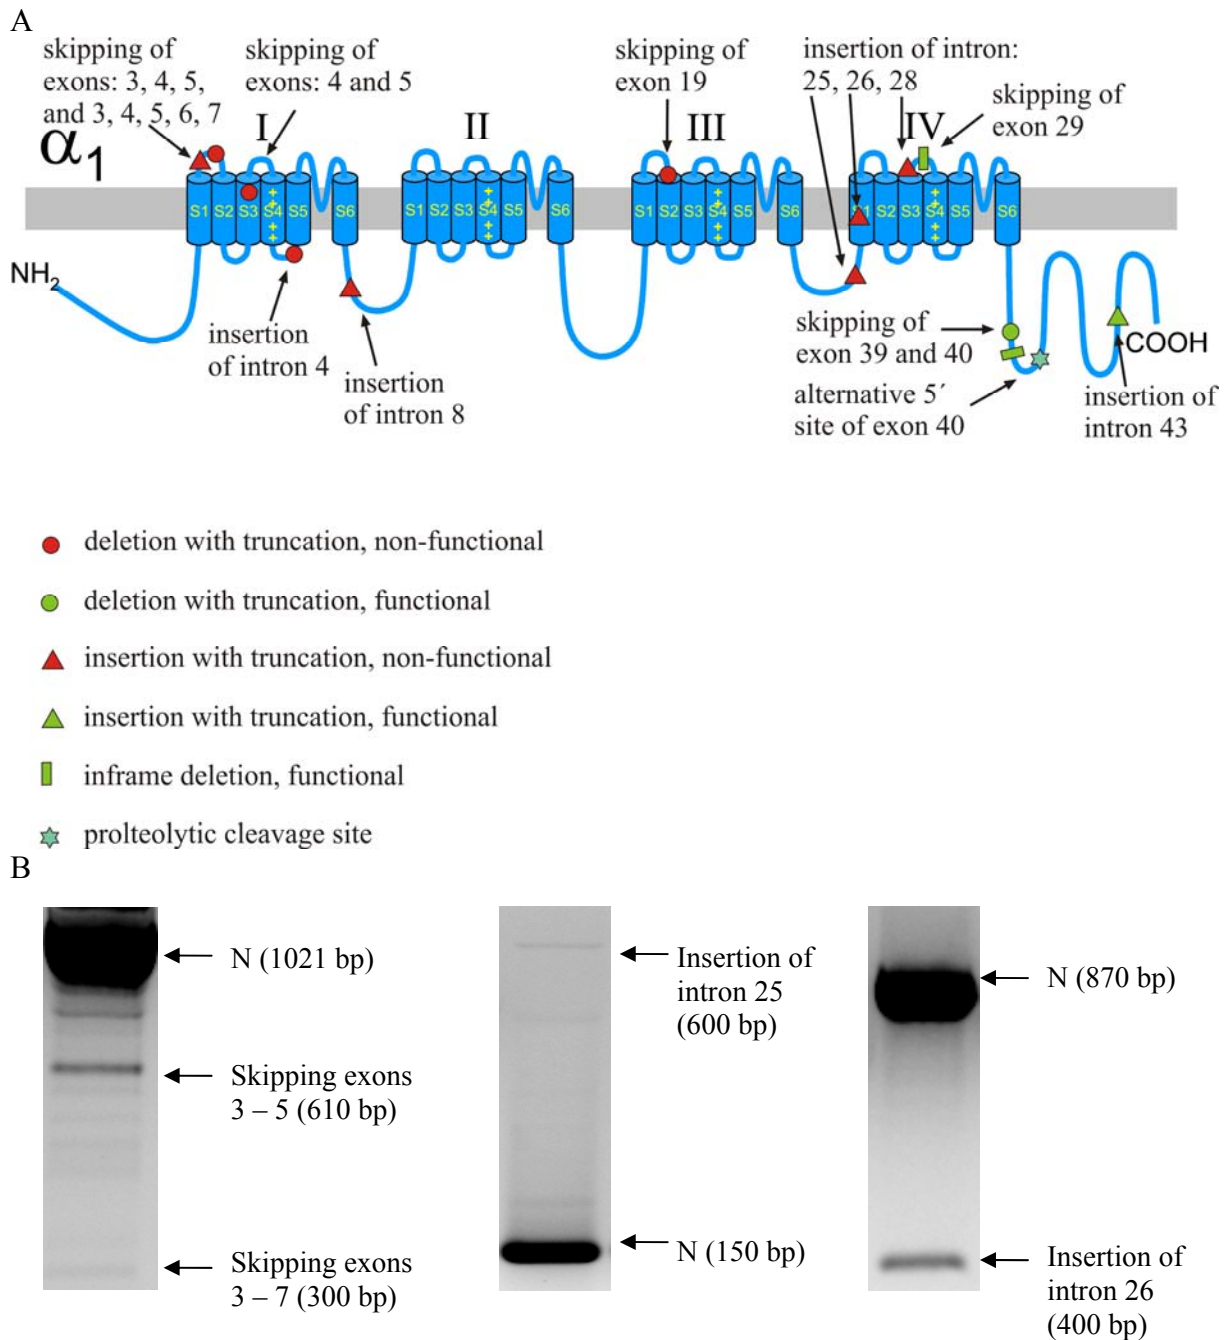

**Figure 1. 13 splicing variants found in the *CACNAIS* gene. A.** Schematic representation of pore forming  $\alpha_1$  subunit of  $\text{Ca}_v1.1$ . Arrows point to segments encoded by alternative splice variants. **B.** Examples of scanning of *CACNAIS* gene uncovered splice variations revealed by different reverse transcriptase PCR product size. Standard band marked with N.

**Table 3: RT-PCR and cloning primers**

| <i>Exons/name</i>           | <i>Forward Primer</i>                                    | <i>Reverse Primer</i>                                     | <i>T<sub>m</sub></i><br>°C | <i>Product</i><br><i>length bp</i> |
|-----------------------------|----------------------------------------------------------|-----------------------------------------------------------|----------------------------|------------------------------------|
| 1-9                         | ttcctgagattctgccaagg                                     | ctgtgtcagagccacctca                                       | 51                         | 1129                               |
| 2-8                         | atcatcttgctcaccatctttgc                                  | ccccgaaggtcctcatcta                                       | 51                         | 929                                |
| 7-10                        | tattttgtcacctcattttgctg                                  | tgcggctggttgtgggtct                                       | 54                         | 437                                |
| 8-10                        | accaaggagcgggagaag                                       | aggcgatagacagggtgtg                                       | 52                         | 340                                |
| 9-15                        | atgaaggtggctctgacaca                                     | ggtttctgtccagcttctg                                       | 51                         | 961                                |
| 10-14                       | ccgacattggaggcagtggga                                    | atcttctgcggtttttctcctc                                    | 51                         | 825                                |
| 13-18                       | acttcatcatcctttctgctgt                                   | catggaatcagcccggatg                                       | 52                         | 563                                |
| 14-18                       | cccagaaggccaaggctgag                                     | cgatgcgggtgacacaggacacg                                   | 55                         | 369                                |
| 17-26                       | acgaggaagatgagcctgag                                     | tgggttttgggaatgtagc                                       | 51                         | 1084                               |
| 18-25                       | atgccacctggtttaccaac                                     | tcatgaagaaggcaatgagg                                      | 52                         | 780                                |
| 24-27                       | tctcagccatgatgtcctctt                                    | gtggttcatctgctccgactg                                     | 54                         | 443                                |
| 25-26                       | catctttgtgggcttctgctcatt                                 | tggtatgggttttgggaatgt                                     | 54                         | 150                                |
| 26-35                       | cacctctcctactttgaatacct                                  | agaacttcccaaagcccaga                                      | 52                         | 971                                |
| 27-34                       | agtccggagcagatgaaccac                                    | atggccttgaactcatccag                                      | 51                         | 790                                |
| 34-40                       | actacctcaccgggactg                                       | cgttggcattgttgattg                                        | 51                         | 843                                |
| 37-42                       | aaccagcatgaagctcttgg                                     | agcagtccttcagcatctc                                       | 52                         | 678                                |
| 39-44                       | cggaccattgaggaagagg                                      | cattggtcatgccagctcta                                      | 51                         | 990                                |
| 34-44                       | actacctcaccgggactg                                       | cattggtcatgccagctcta                                      | 51                         | 1514                               |
| <i>P1/P4</i>                | gcacaagggctccttctgccgcaac                                | atgcgggcgctctcgtctgggtcgtcgatctcg<br>ctgaggatgacgtcaatgat | 60                         | 1059                               |
| <i>P3/P2</i>                | atcattgacgtcatcctcagcgagatcg<br>acgaccagacgagagcggccgcat | ggaagtgctcctgaatgaggaatgtggc                              | 60                         | 1021                               |
| <i>Taqman RT-PCR probes</i> |                                                          |                                                           |                            |                                    |
| 28/29                       | ctaategtcatcggcagcat                                     | cagtctcatgaccgggaaca<br>(for template only)               |                            | 168                                |
|                             | ctaategtcatcggcagcat                                     | ctccaccaggcaatacagt                                       |                            | 91                                 |
|                             | <b>Taqman MGB Probe:</b>                                 | attgacgtcatcctgagc                                        |                            |                                    |
| 28/30                       | ctaategtcatcggcagcat                                     | tctcatctgggtcatcgatct                                     |                            | 61                                 |
|                             | <b>Taqman MGB Probe:</b>                                 | attgacgtcatcctgagc                                        |                            |                                    |

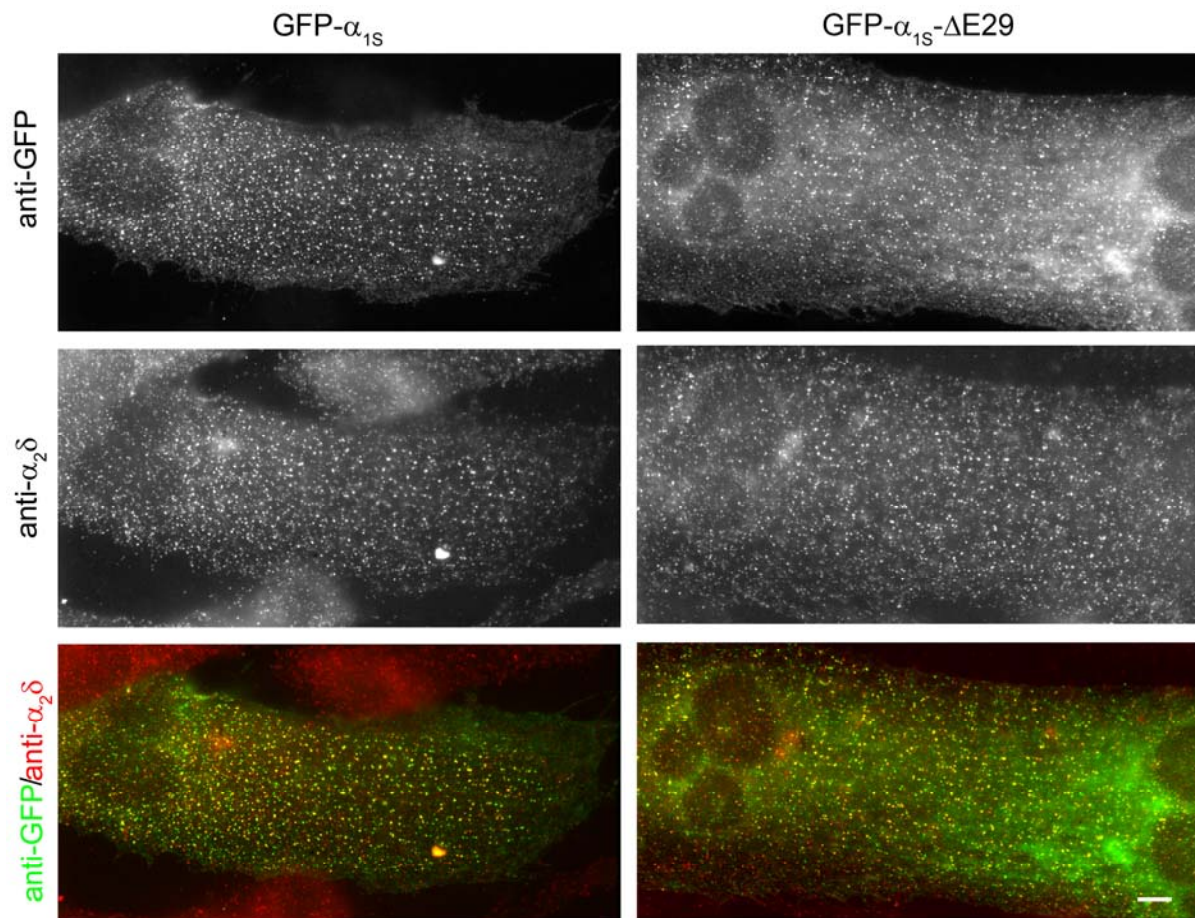

**Figure 2. Deletion of exon 29 does not disturb the colocalization of  $\alpha_{1S}$  and  $\alpha_2\delta$ -1 subunit.** Dysgenic myotubes transfected with GFP- $\alpha_{1S}$  (**left**) or GFP- $\alpha_{1S}\Delta 29$  splice variant (**right**) were double immunolabeled with anti-GFP (**top**) and anti- $\alpha_2\delta$ -1 (**middle**). Clusters of GFP- $\alpha_{1S}$  or GFP- $\alpha_{1S}\Delta 29$  colocalize with clusters of  $\alpha_2\delta$ -1 subunit (**color overlay**). Bar, 10  $\mu\text{m}$ .
